# Supplementary material for: A chemically bonded supercapacitor using a highly stretchable and adhesive gel polymer electrolyte based on an ionic liquid and epoxy-triblock diamine network
Source: Royal Society of Chemistry journal article supplement (doi:10.1039/d0ra02327b), 2020-01-01
Supplement: d0ra02327b1.pdf [file d0ra02327b1.pdf]

## Supporting information

### Chemically bonded super capacitor using highly stretchable and adhesive gel polymer electrolytes based on ionic liquid and epoxy - triblock diamine network

You Kyung Han<sup>a,b</sup>, Jae Yeong Cheon<sup>b</sup>, Taehoon Kim<sup>b</sup>, Sang Bok Lee<sup>b</sup>, Yang Do Kim<sup>a,\*</sup> and Byung Mun Jung<sup>b,\*</sup>

<sup>a</sup> Department of Materials Science and Engineering, Pusan National University, Busan, 46241, Republic of Korea

<sup>b</sup> Functional Composite Department, Korea Institute of Materials Science (KIMS), Changwon 51508, Korea

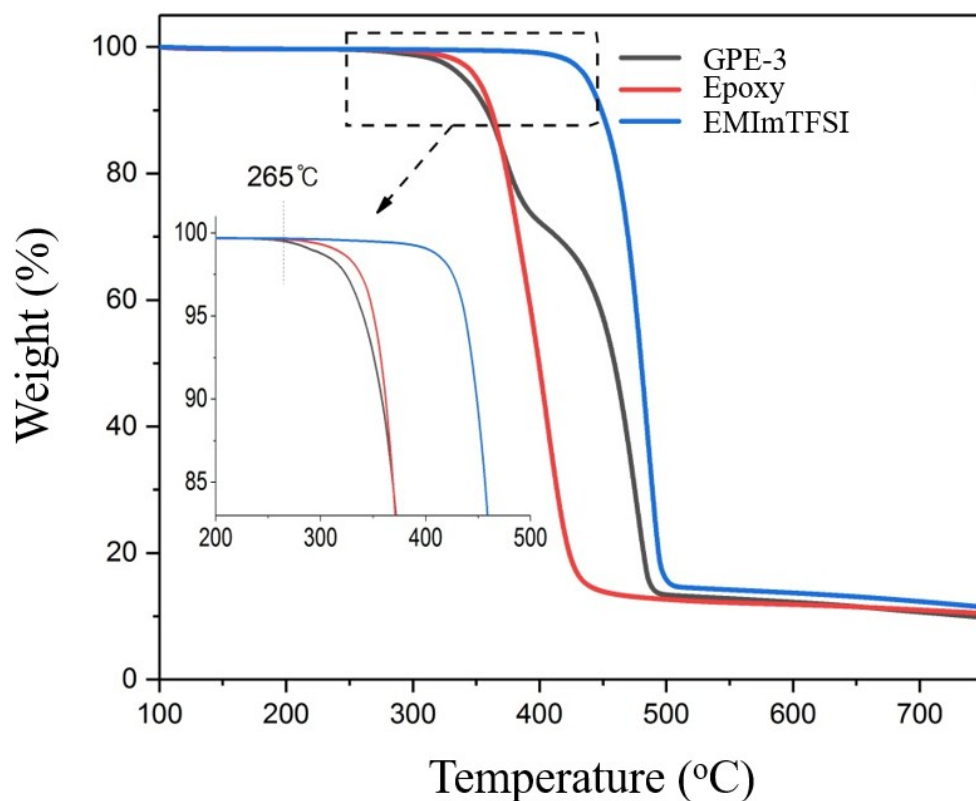

Fig. S1. TGA curve of EMImTFSI, epoxy and GPE-3.

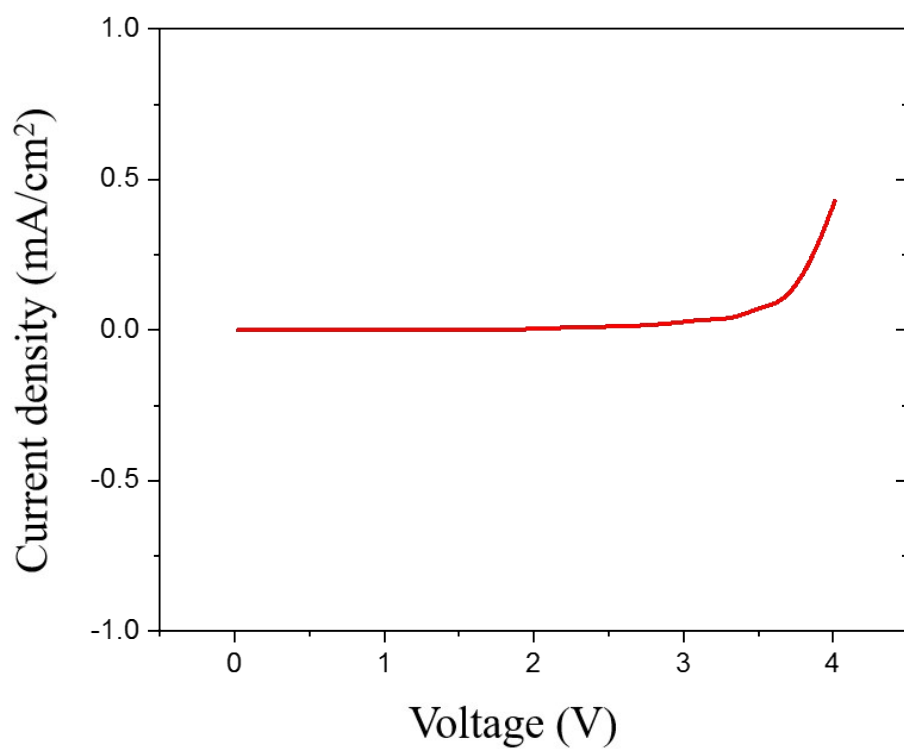

**Fig. S2.** Linear-sweep voltammogram (LSV) of the GPE-3 in Swagelok cell. The measurement was performed at a scan rate of 1 mV/s at room temperature.

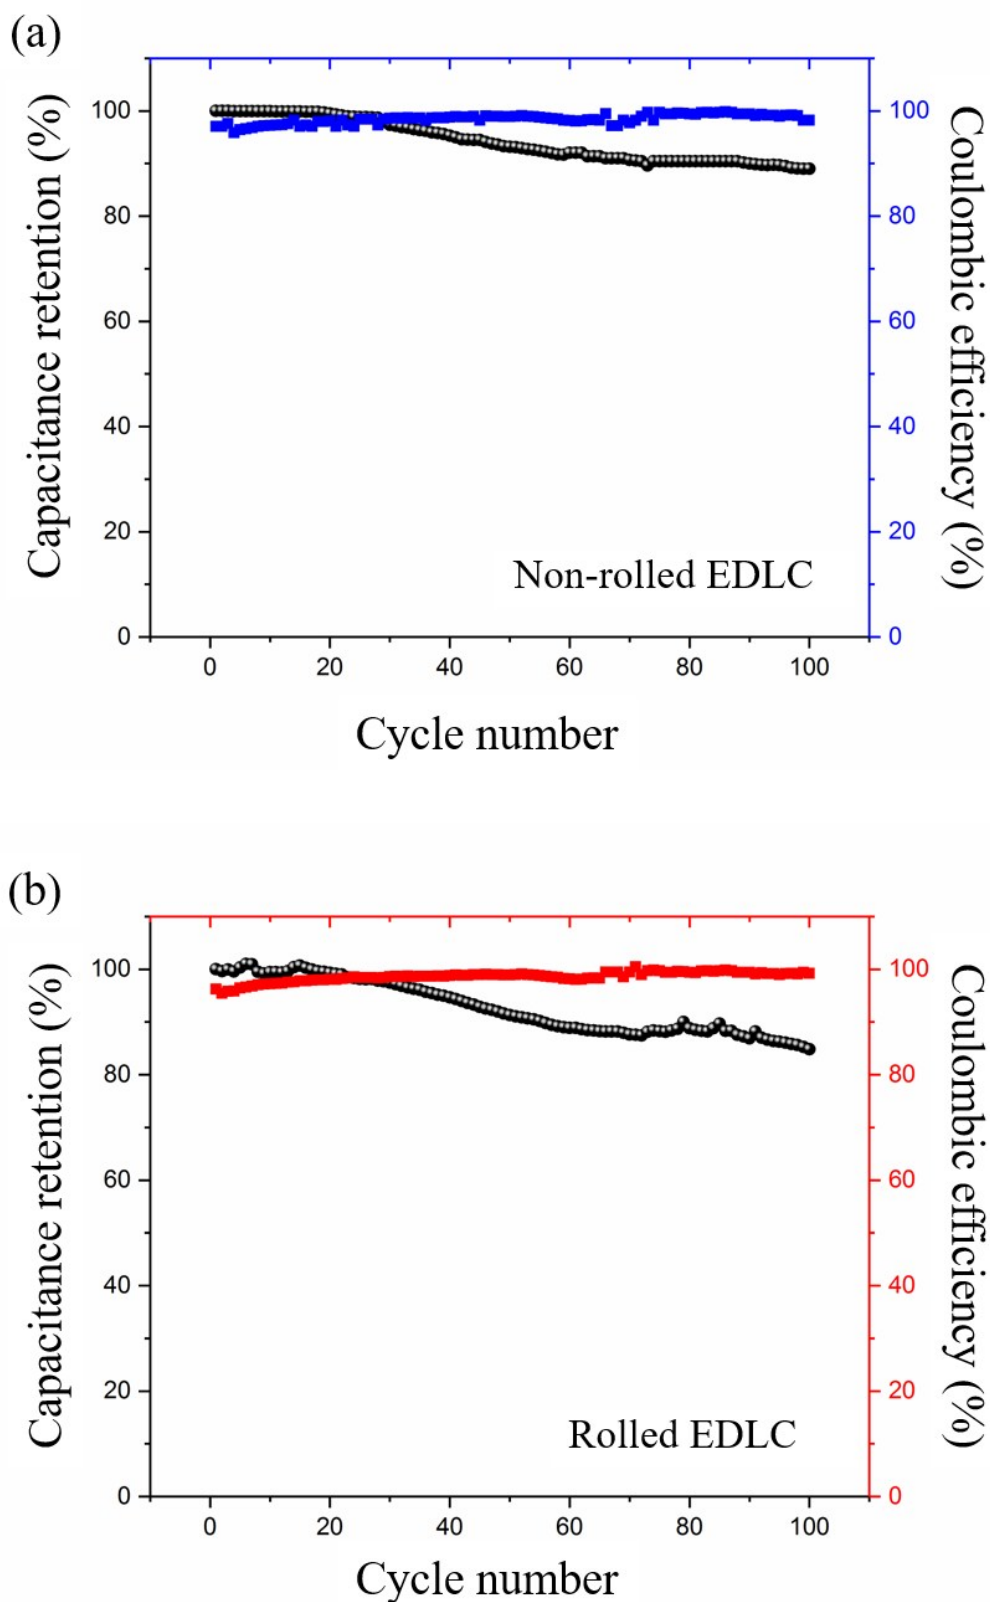

**Fig. S3.** Cycling stability of the (a) non-rolled and (b) rolled EDLC where capacitance plotted 100 cyclic voltammetry cycles, normalized by original capacitance value and coulombic efficiency.

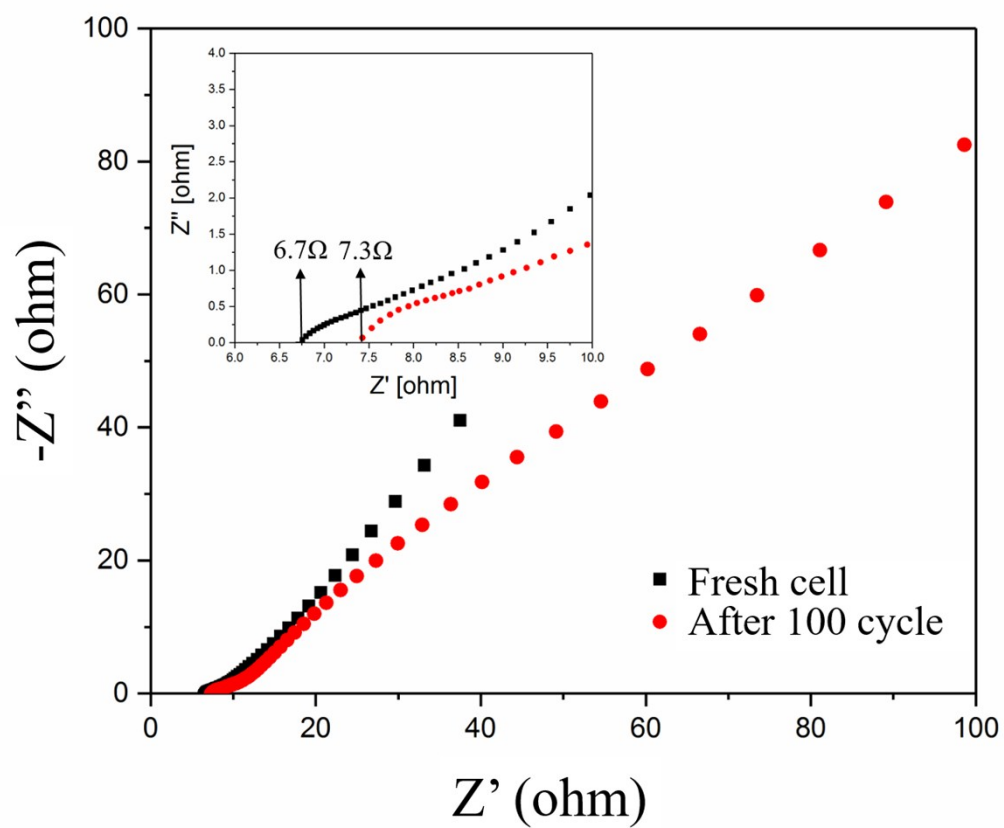

**Fig. S4.** Nyquist impedance plots of the fresh EDLC and EDLC after cyclic test.
